# Supplementary material for: Ag2S nanoparticle-decorated MoS2 for enhanced electrocatalytic and photoelectrocatalytic activity in water splitting
Source: Royal Society of Chemistry journal article supplement (doi:10.1039/c6dt04079a), 2016-12-05
Supplement: c6dt04079a1.pdf [file c6dt04079a1.pdf]

## Supporting Information

# **Ag<sub>2</sub>S nanoparticle-decorated MoS<sub>2</sub> for enhanced electrocatalytic and photoelectrocatalytic activity in water splitting**

Min Wang,<sup>a, c</sup> Peng Ju,<sup>a, b</sup> Wen Li,<sup>a, c</sup> Yun Zhao<sup>a, c</sup> and Xiuxun Han<sup>a, b \*</sup>

<sup>a</sup> Laboratory of Clean Energy Chemistry and Materials, Lanzhou Institute of Chemical Physics, Chinese Academy of Sciences, Lanzhou 730000, PR China

<sup>b</sup> Qingdao Center of Resource Chemistry & New Materials, 36 Jinshui Road, Qingdao 266100, PR China

<sup>c</sup> University of Chinese Academy of Sciences, Beijing 100080, PR China

\* Corresponding authors,

E-mail: [xxhan@licp.cas.cn](mailto:xxhan@licp.cas.cn)

Fax: +86-931-4968054

Tel: +86-931-4968054

Table S1 Weight of MoS<sub>2</sub> and AgNO<sub>3</sub> for preparation of Ag<sub>2</sub>S-MoS<sub>2</sub> composites, and component molar ratio in the product deduced from EDS analysis (see Fig. S1).

|   | MoS <sub>2</sub> (g) | AgNO <sub>3</sub> (g) | EDS result: Ag <sub>2</sub> S/MoS <sub>2</sub><br>(molar ratio, %) | Sample name |
|---|----------------------|-----------------------|--------------------------------------------------------------------|-------------|
| 1 | 0.1600               | 0.0085                | 4.98                                                               | 5%A@M       |
| 2 | 0.1600               | 0.0170                | 10.76                                                              | 11%A@M      |
| 3 | 0.1600               | 0.0204                | 12.39                                                              | 12%A@M      |
| 4 | 0.1600               | 0.0238                | 14.16                                                              | 14%A@M      |
| 5 | 0.1600               | 0.0272                | 16.30                                                              | 16%A@M      |
| 6 | 0.1600               | 0.0306                | 18.54                                                              | 19%A@M      |
| 7 | 0.1600               | 0.0340                | 23.29                                                              | 23%A@M      |

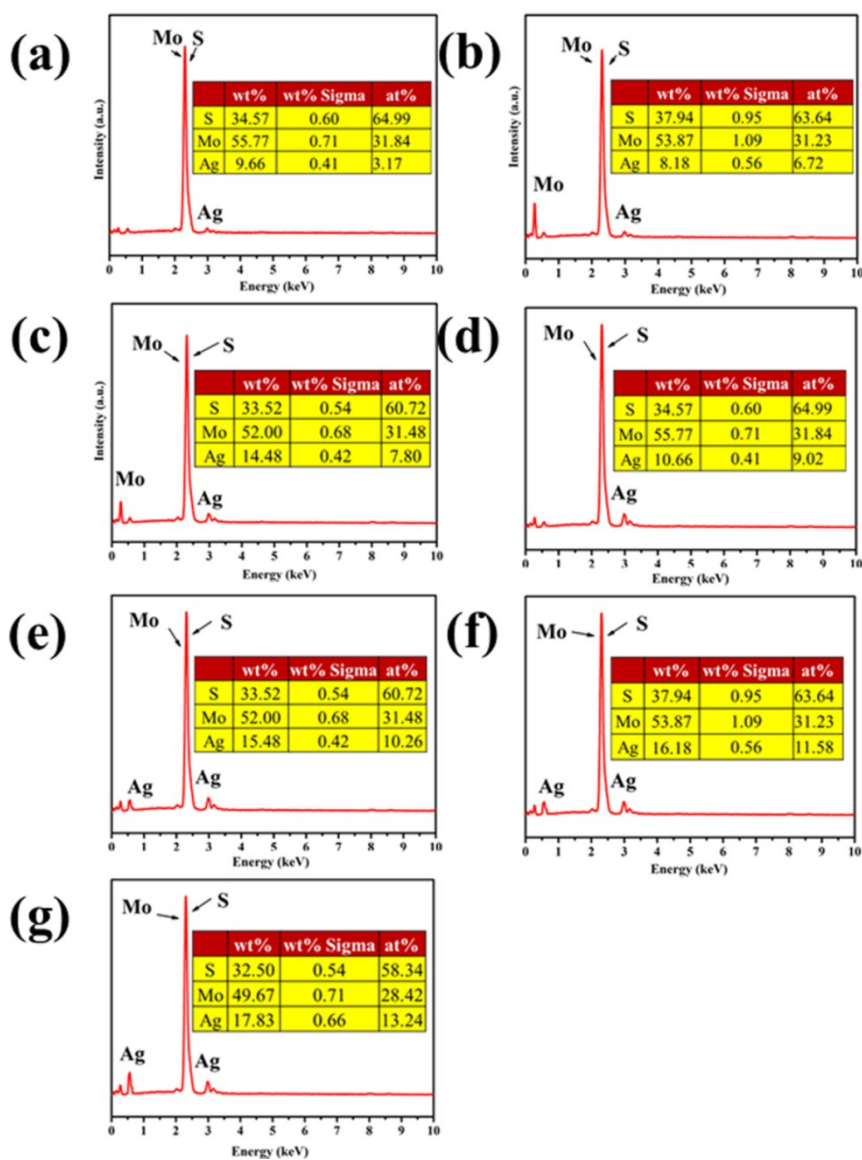

Fig. S1 The EDS analysis of Ag<sub>2</sub>S-MoS<sub>2</sub> composites: (a)-(g) correspond to the sample number 1-7, respectively.

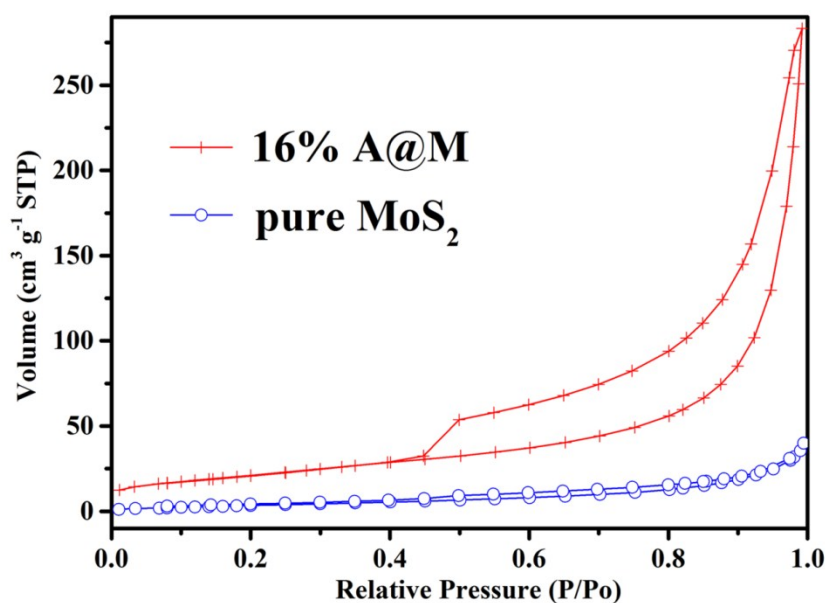

Fig. S2 N<sub>2</sub> adsorption/desorption isotherm curves of pure MoS<sub>2</sub> and the 16% A@M composite.

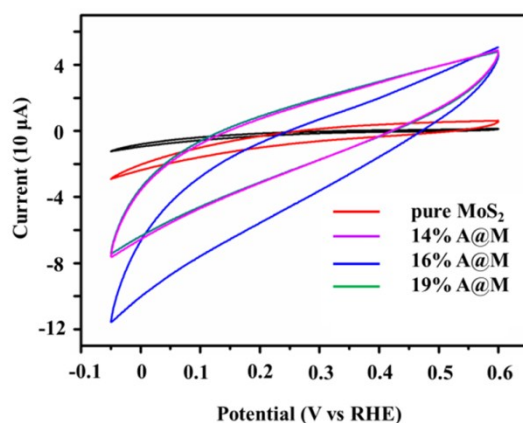

Fig. S3 Cyclic voltammograms (CV) of pure MoS<sub>2</sub>, 14%A@M, 16%A@M, and 19%A@M recorded with the scan rate of 50 mV s<sup>-1</sup>.

Cyclic voltammograms (CV) of pure MoS<sub>2</sub>, 14%A@M, 16%A@M and 19%A@M were recorded with the scan rate of 50 mV s<sup>-1</sup> (Fig. S3). The total voltammetric charges were obtained by integrating the respective CV curves, which was then divided by two assuming the one electron redox process. The value was further divided by the Faraday constant to get the number of active sites ( $A$ ).<sup>1,2</sup> The per-site turnover frequencies were calculated according to the equation of  $TOF = \frac{1}{2FA} I$ , in which  $I$  is the current (in A) at  $\eta = 200$  mV during the linear sweep measurement (Fig. 4a in the manuscript),  $F$  is the Faraday constant (in C mol<sup>-1</sup>), and  $A$  is the content of active sites (in mol), respectively.

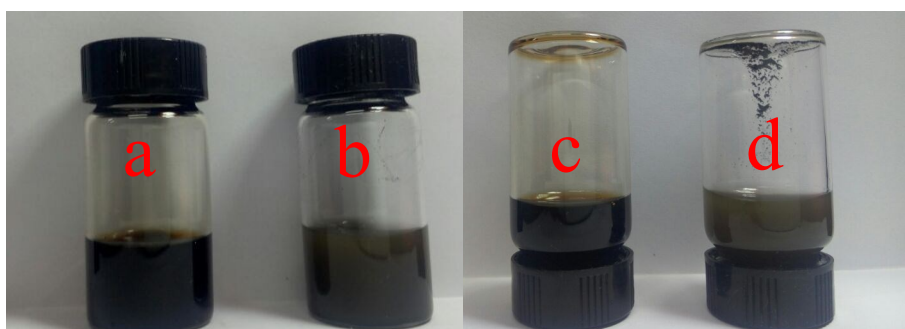

Fig. S4 Photos of MoS<sub>2</sub> (a,c) and Ag<sub>2</sub>S (b,d) dissolved in water (0.2 mg mL<sup>-1</sup>) with 10 min sonication treatment.

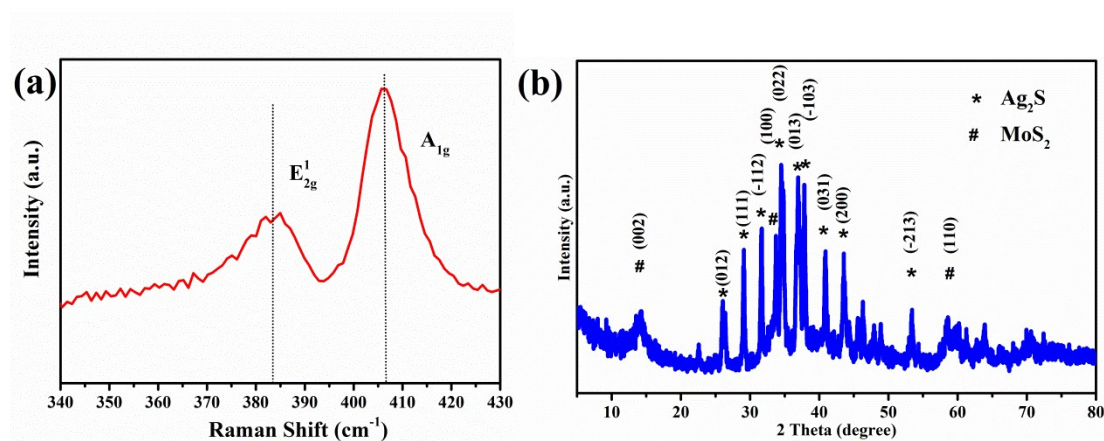

Fig. S5 (a) Raman spectrum and (b) XRD pattern of the used 16%A@M.

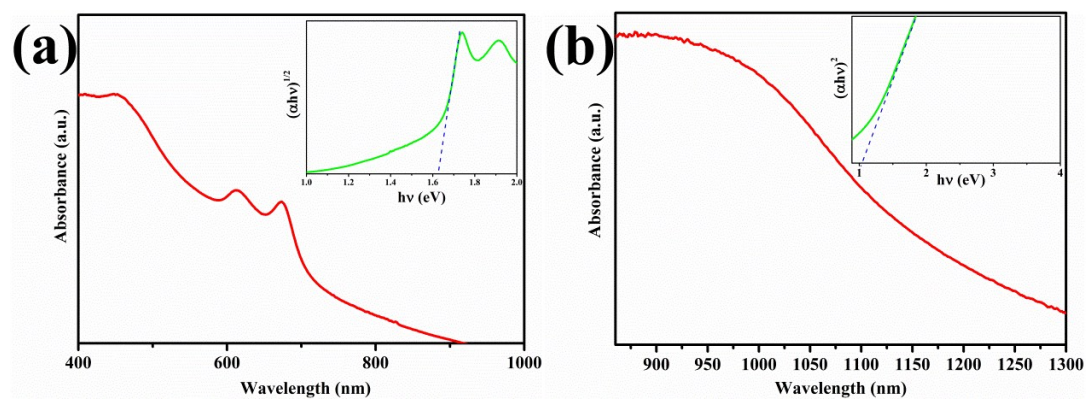

Fig. S6 Absorption spectra of (a) pure MoS<sub>2</sub> and (b) pure Ag<sub>2</sub>S. Insets: Tauc plots of (a) pure MoS<sub>2</sub> and (b) pure Ag<sub>2</sub>S, respectively.

#### References:

- 1 D. Merki, S. Fierro, H. Vrubel and X. L. Hu, *Chem. Sci.*, 2011, **2**, 1262-1267.
- 2 Y. Yan, X. M. Ge, Z. L. Liu, J. Y. Wang, J. M. Lee and X. Wang, *Nanoscale*, 2013, **5**, 7768-7771.
